# Supplementary material for: A New Cr3+ Electrochemical Sensor Based on ATNA/Nafion/Glassy Carbon Electrode
Source: PubMed Central journal article supplement (PMC7345133; doi:10.3390/ma13122695), 2020-06-12
Supplement: materials-13-02695-s001.pdf [file materials-13-02695-s001.pdf]

Dr.Redha Elshistawi  
Sample : SR CDCl3

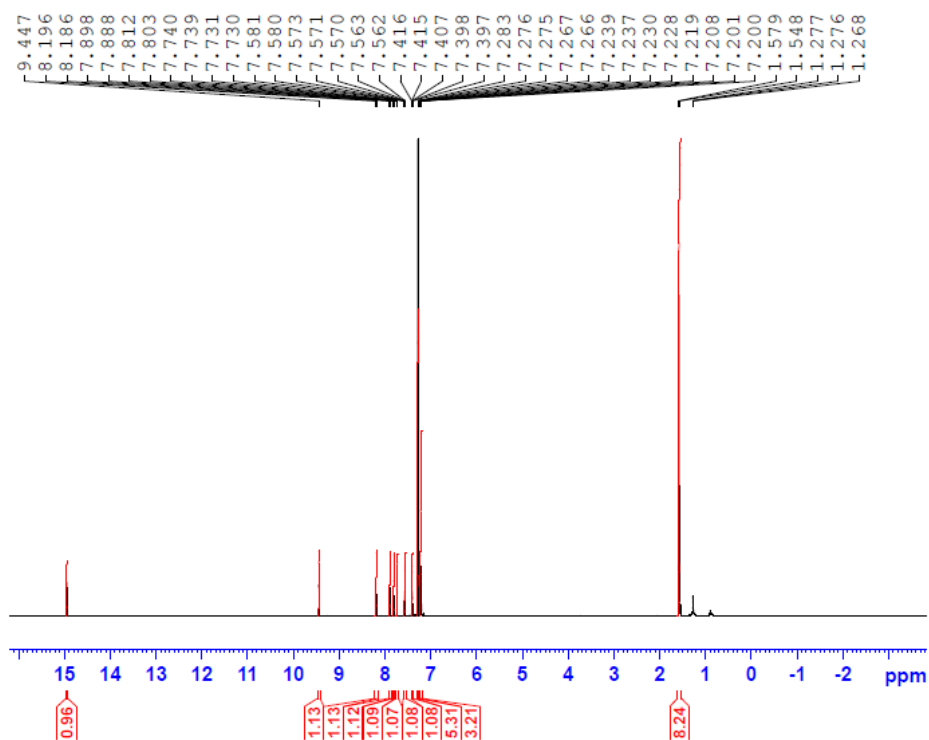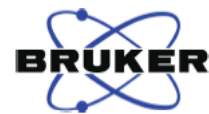

```
Current Data Parameters
NAME REDA SR 21-02-2019
EXPNO 30
PROCNO 1

F2 - Acquisition Parameters
Date_ 20190221
Time 15.11
INSTRUM spect
PROBHD 5 mm CPQCI 1H-
PULPROG zgpg
TD 65536
SOLVENT CDCl3
NS 32
DS 2
SWH 17006.800 Hz
FIDRES 0.259503 Hz
AQ 1.9267584 sec
RG 12.46
SW 29.400 usec
DE 10.00 usec
TE 298.0 K
DL 1.00000000 sec
TDO 1

===== CHANNEL f1 =====
SFO1 850.1552600 MHz
NUC1 1H
P1 8.00 usec
PLW1 15.90000019 W

F2 - Processing parameters
SI 65536
SF 850.1500000 MHz
WDW EM
SSB 0
GB 0 0.30 Hz
PC 1.00
```

S1.

Dr.Redha Elshistawi  
Sample : SR CDCL3

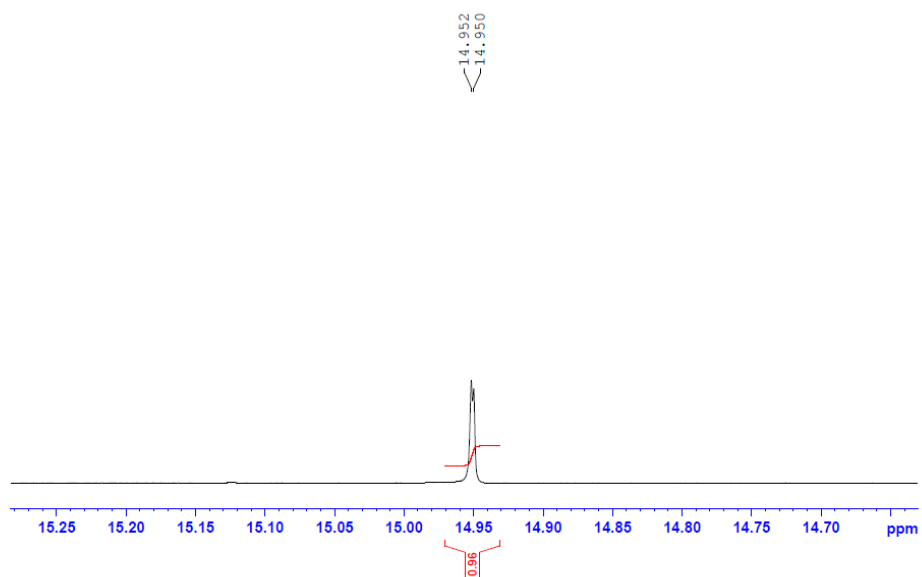

S2.

Dr.Redha Elshistawi  
Sample : SR CDCL3

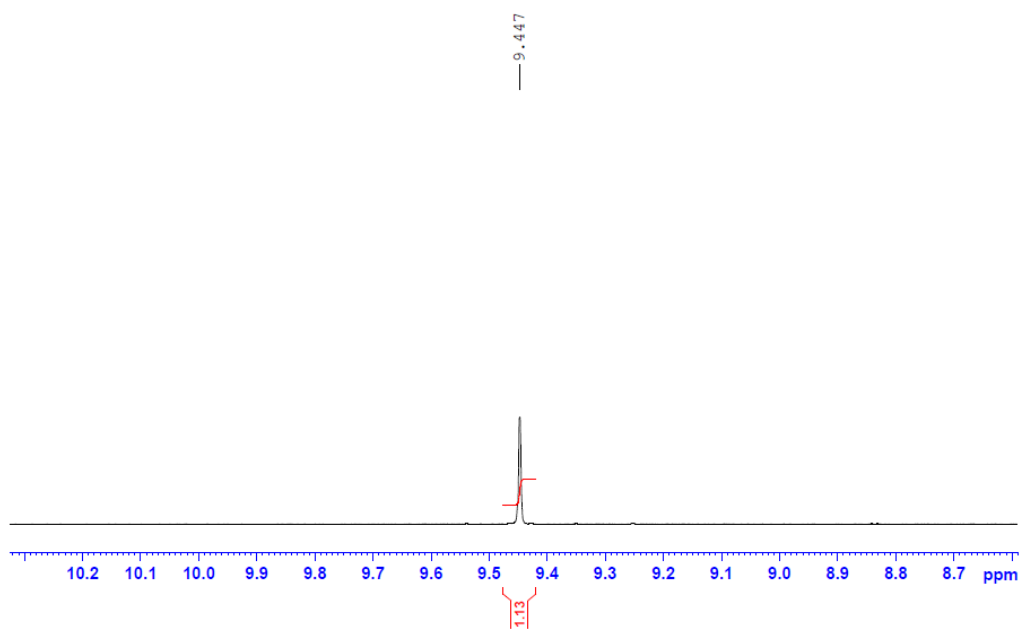

S3.

Dr.Redha Elshistawi  
Sample : SR CDCL3

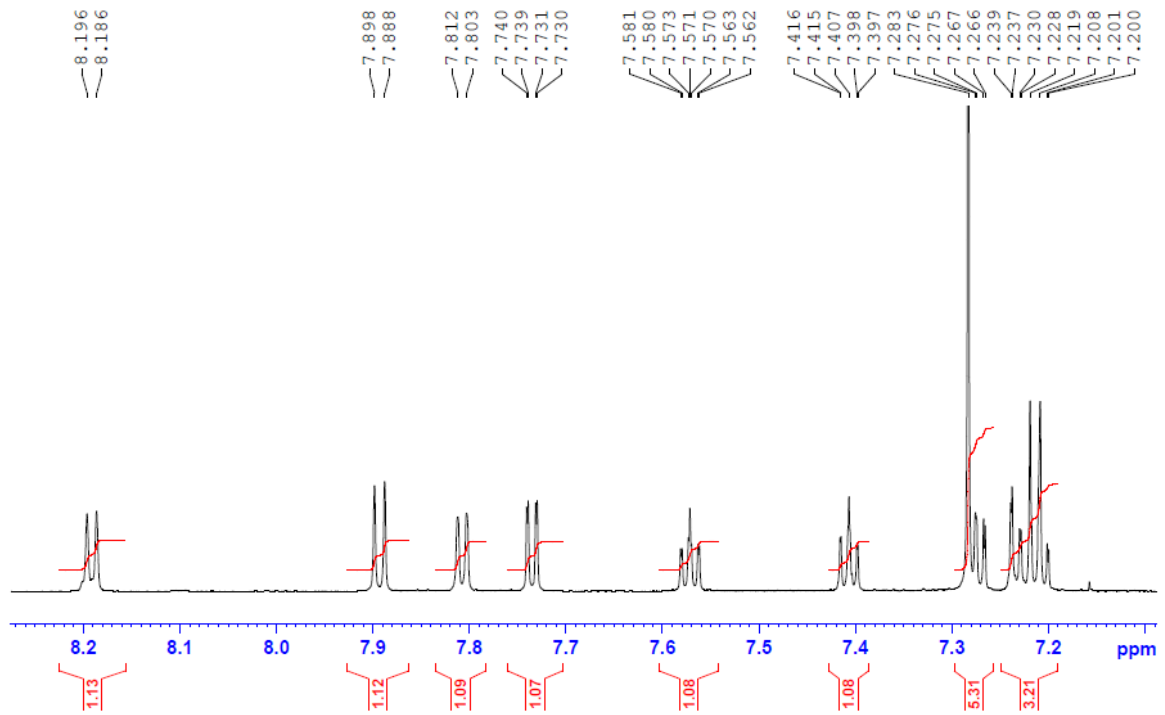

S4.

Figure S1. Proton NMR of ATNA (S1-S4).

Dr.Redha Elshistawi  
Sample : SR CDCL3

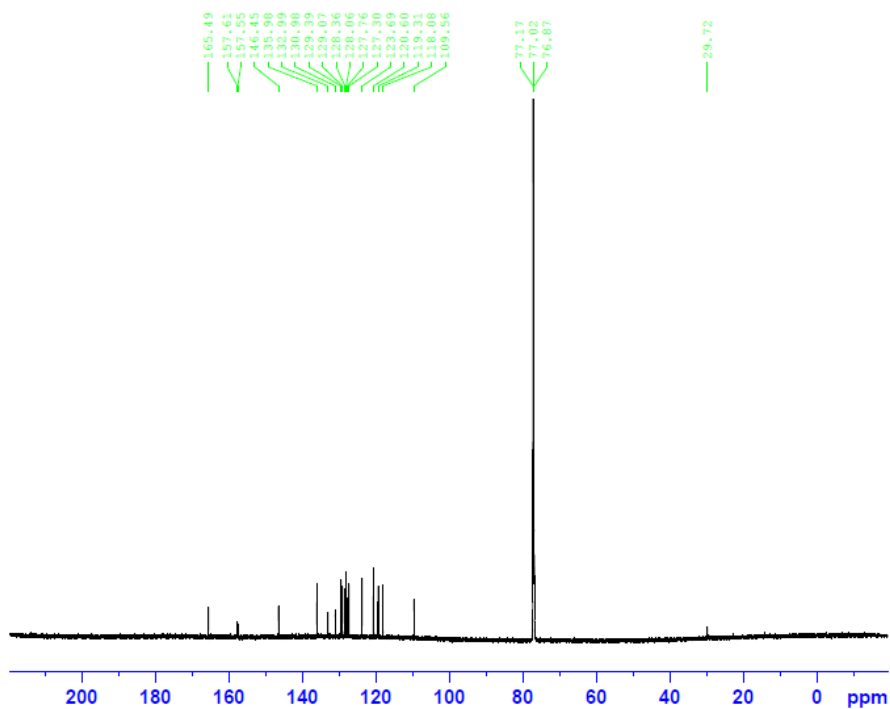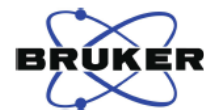

```
Current Data Parameters
NAME REDA SR 21-02-2019
EXPNO 31
PROCNO 1

F2 - Acquisition Parameters
Date_ 20190221
Time 15.14
INSTRUM spect
PROBHD 5 mm CPQCI 1H-
PULPROG zgpg30
TD 65536
SOLVENT CDCL3
NS 2500
DS 4
SWH 51020.406 Hz
FIDRES 0.779510 Hz
AQ 0.6422528 sec
SC 186.93
DSW 9.800 usec
DE 18.00 usec
TE 298.0 K
D1 2.00000000 sec
d11 0.03000000 sec
TD0 1

----- CHANNEL f1 -----
SFO1 213.7917636 MHz
NUC1 13C
P1 12.00 usec
PLM1 130.00000000 W

----- CHANNEL f2 -----
SFO2 850.1534006 MHz
NUC2 1H
CPDPRG2 waltz16
PCPD2 80.00 usec
PLM2 13.80000019 W
PLM12 0.13800000 W
PLM13 0.08832000 W

F2 - Processing parameters
SI 32768
SF 213.7703875 MHz
WDW EM
SSB 0
LB 1.00 Hz
GB 0
PC 1.40
```

Dr.Redha Elshistawi  
Sample : SR CDCL3

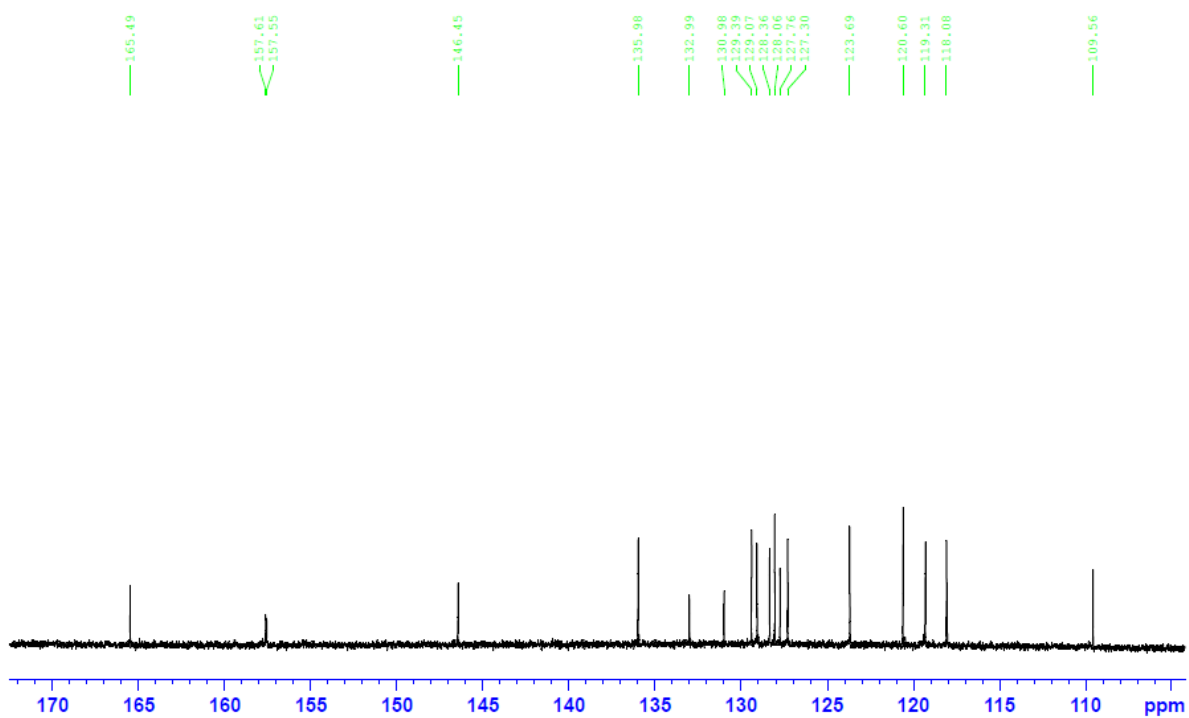

S6.

Figure S2. Carbon NMR of ATNA (S5 and S6).

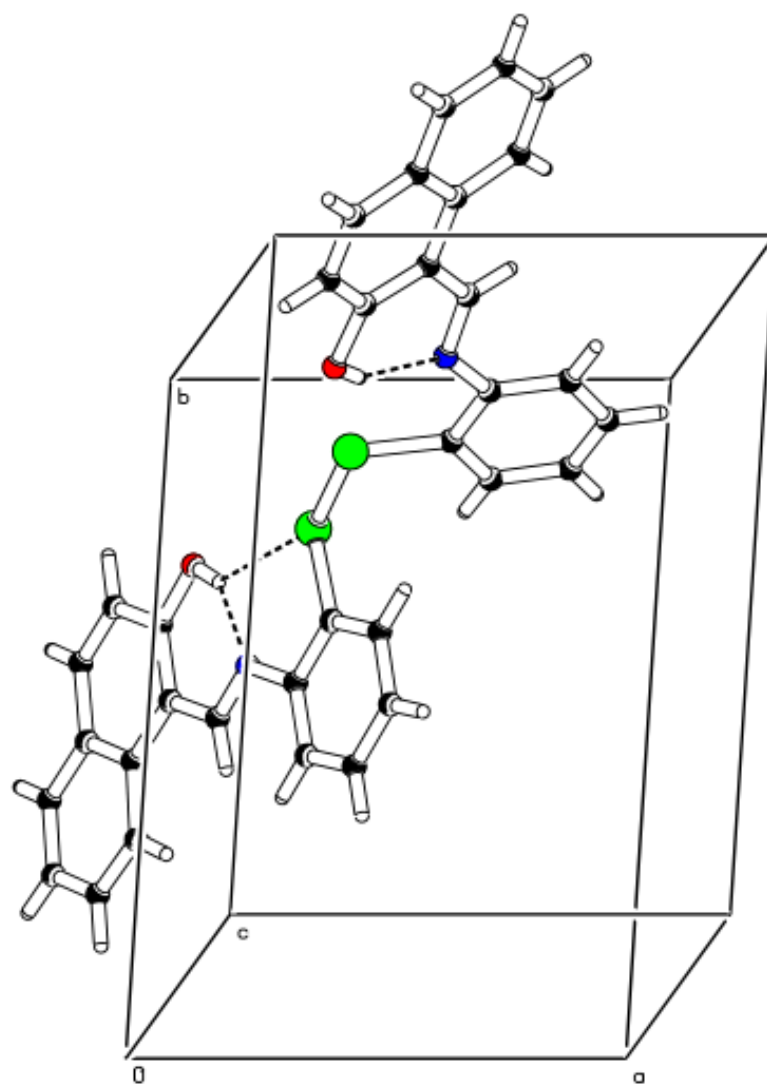

**Figure S3.** A unit cell diagram of ATNA showing Intramolecular hydrogen bonding using dashed lines.

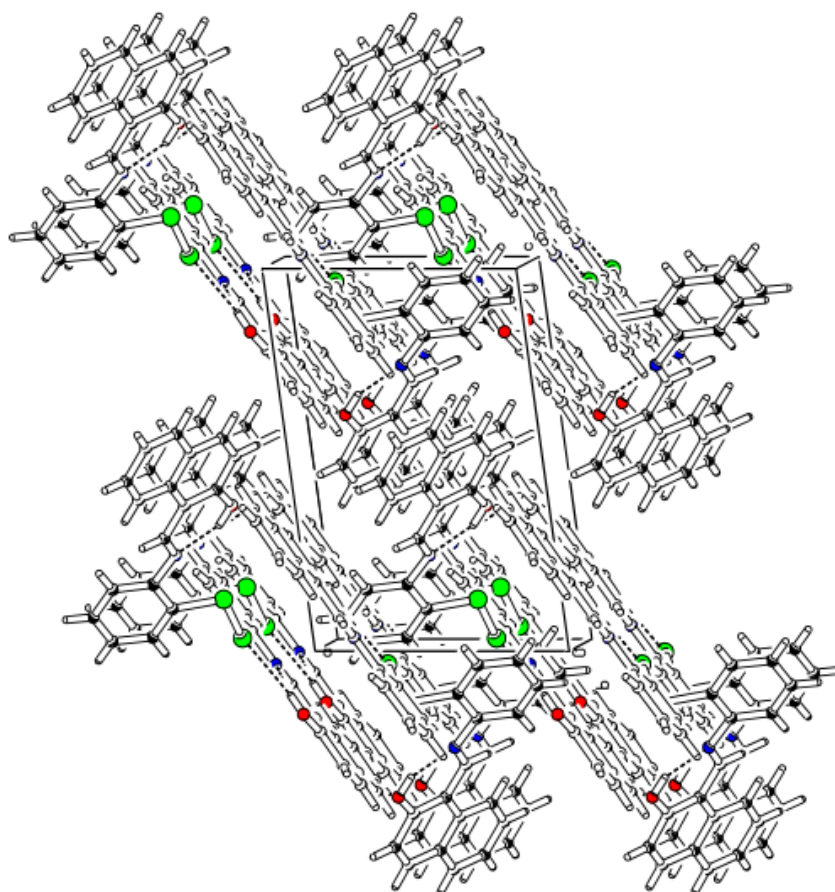

**Figure S4.** A packing diagram where planes are parallel to each other and showing the possibility of  $\pi$ - $\pi$  interactions.

**Table S1.** Bond Lengths for ATNA.

| Atom       | Atom       | Length/Å         | Atom | Atom | Length/Å    |
|------------|------------|------------------|------|------|-------------|
| C1         | C2         | 1.400 (3)        | C18  | C19  | 1.392 (3)   |
| C1         | C11        | 1.441 (3)        | C18  | S2   | 1.787 (2)   |
| C1         | C6         | 1.450 (3)        | C19  | C20  | 1.384 (3)   |
| C2         | O1         | 1.342 (3)        | C19  | N2   | 1.416 (3)   |
| C2         | C3         | 1.397 (4)        | C20  | C21  | 1.378 (4)   |
| C3         | C4         | 1.351 (4)        | C21  | C22  | 1.373 (4)   |
| C4         | C5         | 1.409 (4)        | C22  | C23  | 1.365 (3)   |
| C5         | C6         | 1.409 (4)        | C24  | N2   | 1.282 (3)   |
| C5         | C10        | 1.425 (4)        | C24  | C25  | 1.433 (3)   |
| C6         | C7         | 1.402 (3)        | C25  | C26  | 1.398 (3)   |
| C7         | C8         | 1.366 (4)        | C25  | C30  | 1.446 (3)   |
| C8         | C9         | 1.393 (4)        | C26  | O2   | 1.344 (3)   |
| C9         | C10        | 1.346 (4)        | C26  | C27  | 1.411 (4)   |
| C11        | N1         | 1.286 (3)        | C27  | C28  | 1.341 (4)   |
| C12        | C13        | 1.397 (3)        | C28  | C29  | 1.414 (4)   |
| C12        | C17        | 1.402 (3)        | C29  | C34  | 1.409 (4)   |
| C12        | N1         | 1.407 (3)        | C29  | C30  | 1.419 (3)   |
| C13        | C14        | 1.385 (3)        | C30  | C31  | 1.405 (3)   |
| C13        | S1         | 1.780 (3)        | C31  | C32  | 1.377 (3)   |
| C14        | C15        | 1.386 (4)        | C32  | C33  | 1.380 (4)   |
| C15        | C16        | 1.377 (4)        | C33  | C34  | 1.355 (4)   |
| C16        | C17        | 1.362 (4)        | S1   | S2   | 2.0234 (10) |
| <b>C18</b> | <b>C23</b> | <b>1.384 (3)</b> |      |      |             |



Table S2. Bond Angles for ATNA.

| Atom | Atom | Atom | Angle/° | Atom        | Atom | Atom | Angle/° |             |
|------|------|------|---------|-------------|------|------|---------|-------------|
|      | C2   | C1   | C11     | 120.0 (2)   | C19  | C18  | S2      | 115.80 (18) |
|      | C2   | C1   | C6      | 118.5 (2)   | C20  | C19  | C18     | 118.5 (2)   |
| 1    | C1   | C1   | C6      | 121.4 (2)   | C20  | C19  | N2      | 125.1 (2)   |
|      | O1   | C2   | C3      | 116.5 (2)   | C18  | C19  | N2      | 116.4 (2)   |
|      | O1   | C2   | C1      | 122.5 (2)   | C21  | C20  | C19     | 120.8 (2)   |
|      | C3   | C2   | C1      | 121.0 (3)   | C22  | C21  | C20     | 119.7 (2)   |
|      | C4   | C3   | C2      | 120.3 (3)   | C23  | C22  | C21     | 120.8 (3)   |
|      | C3   | C4   | C5      | 121.9 (3)   | C22  | C23  | C18     | 119.7 (2)   |
|      | C6   | C5   | C4      | 119.3 (3)   | N2   | C24  | C25     | 122.8 (2)   |
|      | C6   | C5   | C10     | 119.5 (3)   | C26  | C25  | C24     | 120.2 (2)   |
|      | C4   | C5   | C10     | 121.3 (3)   | C26  | C25  | C30     | 118.4 (2)   |
|      | C7   | C6   | C5      | 117.6 (2)   | C24  | C25  | C30     | 121.4 (2)   |
|      | C7   | C6   | C1      | 123.4 (2)   | O2   | C26  | C25     | 122.0 (2)   |
|      | C5   | C6   | C1      | 119.0 (2)   | O2   | C26  | C27     | 117.2 (2)   |
|      | C8   | C7   | C6      | 121.9 (3)   | C25  | C26  | C27     | 120.8 (2)   |
|      | C7   | C8   | C9      | 120.1 (3)   | C28  | C27  | C26     | 120.5 (3)   |
| 0    | C1   | C9   | C8      | 120.3 (3)   | C27  | C28  | C29     | 122.2 (3)   |
|      | C9   | C10  | C5      | 120.7 (3)   | C34  | C29  | C28     | 122.0 (3)   |
|      | N1   | C11  | C1      | 122.3 (2)   | C34  | C29  | C30     | 119.3 (3)   |
| 3    | C1   | C12  | C17     | 118.5 (2)   | C28  | C29  | C30     | 118.6 (2)   |
| 3    | C1   | C12  | N1      | 116.8 (2)   | C31  | C30  | C29     | 117.2 (2)   |
| 7    | C1   | C12  | N1      | 124.6 (2)   | C31  | C30  | C25     | 123.3 (2)   |
| 4    | C1   | C13  | C12     | 120.1 (3)   | C29  | C30  | C25     | 119.5 (2)   |
| 4    | C1   | C13  | S1      | 124.5 (2)   | C32  | C31  | C30     | 121.3 (3)   |
| 2    | C1   | C13  | S1      | 115.39 (19) | C31  | C32  | C33     | 121.2 (3)   |
| 3    | C1   | C14  | C15     | 120.2 (3)   | C34  | C33  | C32     | 119.1 (3)   |
| 6    | C1   | C15  | C14     | 119.6 (3)   | C33  | C34  | C29     | 121.9 (3)   |
| 7    | C1   | C16  | C15     | 120.9 (3)   | C11  | N1   | C12     | 122.0 (2)   |
| 6    | C1   | C17  | C12     | 120.6 (3)   | C24  | N2   | C19     | 122.80 (19) |
| 3    | C2   | C18  | C19     | 120.4 (2)   | C13  | S1   | S2      | 105.28 (9)  |
| 3    | C2   | C18  | S2      | 123.76 (19) | C18  | S2   | S1      | 104.91 (9)  |
